# Supplementary material for: Thermal cycling-hyperthermia in combination with polyphenols, epigallocatechin gallate and chlorogenic acid, exerts synergistic anticancer effect against human pancreatic cancer PANC-1 cells
Source: PubMed Central journal article supplement (PMC6544372; doi:10.1371/journal.pone.0217676), 2019-05-31
Supplement: pone.0217676.s005.pdf [file pone.0217676.s005.pdf]

|             |  | Ctrl         |              |              |              |
|-------------|--|--------------|--------------|--------------|--------------|
|             |  | Annexin-/PI- | Annexin-/PI+ | Annexin+/PI- | Annexin+/PI+ |
|             |  | 93.8         | 0.9          | 3.9          | 1.4          |
|             |  | 93.7         | 0.8          | 4.3          | 1.2          |
|             |  | 95.4         | 0.6          | 3.1          | 0.9          |
| <b>Mean</b> |  | 94.300       | 0.767        | 3.767        | 1.167        |
| <b>SD</b>   |  | 0.954        | 0.153        | 0.611        | 0.252        |

|             |  | DMSO         |              |              |              |
|-------------|--|--------------|--------------|--------------|--------------|
|             |  | Annexin-/PI- | Annexin-/PI+ | Annexin+/PI- | Annexin+/PI+ |
|             |  | 95.7         | 1.2          | 1.5          | 1.5          |
|             |  | 96           | 1            | 1.6          | 1.4          |
|             |  | 95.5         | 2            | 1.4          | 1.1          |
| <b>Mean</b> |  | 95.733       | 1.400        | 1.500        | 1.333        |
| <b>SD</b>   |  | 0.252        | 0.529        | 0.100        | 0.208        |

|             |  | CGA          |              |              |              |
|-------------|--|--------------|--------------|--------------|--------------|
|             |  | Annexin-/PI- | Annexin-/PI+ | Annexin+/PI- | Annexin+/PI+ |
|             |  | 87.8         | 0.9          | 6.9          | 4.4          |
|             |  | 85.4         | 0.5          | 10           | 4.1          |
|             |  | 87.6         | 0.5          | 6.9          | 2.8          |
| <b>Mean</b> |  | 86.933       | 0.633        | 7.933        | 3.767        |
| <b>SD</b>   |  | 1.332        | 0.231        | 1.790        | 0.850        |

|             |  | EGCG         |              |              |              |
|-------------|--|--------------|--------------|--------------|--------------|
|             |  | Annexin-/PI- | Annexin-/PI+ | Annexin+/PI- | Annexin+/PI+ |
|             |  | 89           | 0.3          | 8.9          | 1.7          |
|             |  | 91.9         | 0.4          | 7            | 1.5          |
|             |  | 89.9         | 0.5          | 7.1          | 2.4          |
| <b>Mean</b> |  | 90.267       | 0.400        | 7.667        | 1.867        |
| <b>SD</b>   |  | 1.484        | 0.100        | 1.069        | 0.473        |

| TC          |              |              |              |              |        |
|-------------|--------------|--------------|--------------|--------------|--------|
|             | Annexin-/PI- | Annexin-/PI+ | Annexin+/PI- | Annexin+/PI+ |        |
|             | 90           | 0.6          | 6.7          | 2.8          |        |
|             | 91.6         | 1.2          | 4.3          | 2.8          |        |
|             | 89.8         | 0.2          | 7.9          | 2.2          |        |
| <b>Mean</b> | 90.467       | 0.667        | 6.300        | 2.600        |        |
| <b>SD</b>   | 0.987        | 0.503        | 1.833        | 0.346        |        |
| DMSO+TC     |              |              |              |              |        |
|             | Annexin-/PI- | Annexin-/PI+ | Annexin+/PI- | Annexin+/PI+ |        |
|             | 95.2         | 0.9          | 2.1          | 1.8          | 3.9    |
|             | 92.8         | 0.8          | 4.5          | 1.7          | 6.2    |
|             | 93.1         | 0.6          | 4.8          | 1.5          | 6.3    |
| <b>Mean</b> | 93.700       | 0.767        | 3.800        | 1.667        | 5.467  |
| <b>SD</b>   | 1.308        | 0.153        | 1.480        | 0.153        | 1.358  |
| CGA+TC      |              |              |              |              |        |
|             | Annexin-/PI- | Annexin-/PI+ | Annexin+/PI- | Annexin+/PI+ |        |
|             | 66.6         | 2.3          | 19.7         | 11.4         | 31.1   |
|             | 65.3         | 1.2          | 12.9         | 20.6         | 33.5   |
|             | 60.4         | 1.4          | 23.2         | 15           | 38.2   |
| <b>Mean</b> | 64.100       | 1.633        | 18.600       | 15.667       | 34.267 |
| <b>SD</b>   | 3.270        | 0.586        | 5.237        | 4.636        | 3.612  |
| EGCG+TC     |              |              |              |              |        |
|             | Annexin-/PI- | Annexin-/PI+ | Annexin+/PI- | Annexin+/PI+ |        |
|             | 53.8         | 1.4          | 24.9         | 19.8         | 44.7   |
|             | 60.4         | 1.7          | 24.6         | 13.3         | 37.9   |
|             | 53.1         | 1.4          | 23.4         | 22.1         | 45.5   |
| <b>Mean</b> | 55.767       | 1.500        | 24.300       | 18.400       | 42.700 |
| <b>SD</b>   | 4.028        | 0.173        | 0.794        | 4.564        | 4.176  |

| C           |             |             |
|-------------|-------------|-------------|
| G0/G1       | S           | G2/M        |
| 54.84       |             | 28.67       |
| 59.67       |             | 24.56       |
| 58.62       |             | 24.68       |
| 57.71       |             | 25.97       |
| 2.540334624 | 2.339038264 | 0.651996933 |

| DMSO        |             |             |
|-------------|-------------|-------------|
| G0/G1       | S           | G2/M        |
| 56.06       |             | 25.52       |
| 51.5        |             | 26.18       |
| 51.63       |             | 27.34       |
| 53.06333333 | 26.34666667 | 20.59       |
| 2.596003338 | 0.921375783 | 1.993464321 |

| CGA         |             |             |
|-------------|-------------|-------------|
| G0/G1       | S           | G2/M        |
| 59.07       |             | 21.89       |
| 55.3        |             | 22.56       |
| 53.02       |             | 27.09       |
| 55.79666667 | 23.84666667 | 20.35666667 |
| 3.055426866 | 2.828715845 | 1.601821879 |

| EGCG        |             |             |
|-------------|-------------|-------------|
| G0/G1       | S           | G2/M        |
| 50.24       |             | 26.64       |
| 55.13       |             | 23.91       |
| 54.11       |             | 23.27       |
| 53.16       | 24.60666667 | 22.23333333 |
| 2.579709286 | 1.789757898 | 1.130722483 |

| TC          |             |             |
|-------------|-------------|-------------|
| G0/G1       | S           | G2/M        |
| 50.87       |             | 19.41       |
| 54.2        |             | 16.59       |
| 57.21       |             | 24.77       |
| 54.09333333 | 20.25666667 | 25.64666667 |
| 3.171345666 | 4.155205571 | 6.610002521 |

| DMSO+TC     |             |             |
|-------------|-------------|-------------|
| G0/G1       | S           | G2/M        |
| 49.99       |             | 27.21       |
| 51.86       |             | 24.88       |
| 53.99       |             | 23.17       |
| 51.94666667 | 25.08666667 | 22.96666667 |
| 2.001407838 | 2.027913542 | 0.254820198 |

| CGA+TC      |             |             |
|-------------|-------------|-------------|
| G0/G1       | S           | G2/M        |
| 44.35       |             | 21.6        |
| 49.74       |             | 14.14       |
| 50.85       |             | 11.46       |
| 48.31333333 | 15.73333333 | 35.95666667 |
| 3.476928721 | 5.254420361 | 1.826179984 |

| EGCG+TC     |             |             |
|-------------|-------------|-------------|
| G0/G1       | S           | G2/M        |
| 36.8        |             | 21.24       |
| 35.98       |             | 17.23       |
| 37.21       |             | 20.87       |
| 36.66333333 | 19.78       | 43.55333333 |
| 0.626285345 | 2.216100178 | 2.803075692 |

## MMP

| C           | DMSO        |             | 200         | 20 TC       | DMSO+TC     |             | 200TC       | 20TC |
|-------------|-------------|-------------|-------------|-------------|-------------|-------------|-------------|------|
|             | 2.1         | 5.5         | 3           | 6.7         | 13.1        | 5.5         | 36.7        | 68.4 |
|             | 7           | 3.7         | 6.2         | 4.4         | 3.6         | 5.5         | 48.2        | 75.2 |
|             | 7.5         | 4.2         | 4.7         | 9.6         | 9.4         | 7           | 47.2        | 83.5 |
| 5.533333333 | 4.466666667 | 4.633333333 |             | 6.9         | 8.7         | 6           | 44.03333333 | 75.7 |
| 2.983845394 | 0.929157324 | 1.601041328 | 2.605762844 | 4.788527958 | 0.866025404 | 6.370504951 | 7.562407024 |      |

## ROS

| C | DMSO        |             | 200         | 20 TC       | DTC         | 200TC       | 20TC        |
|---|-------------|-------------|-------------|-------------|-------------|-------------|-------------|
| 1 | 1.011862197 | 1.06366628  | 1.104932306 | 1.305825922 | 1.19640415  | 2.432041935 | 3.621156024 |
| 0 | 0.034052381 | 0.050490275 | 0.101528241 | 0.121245507 | 0.104278388 | 0.189552541 | 0.684832326 |
